# Supplementary material for: Coexistence of Lateral and Co-Tuned Inhibitory Configurations in Cortical Networks
Source: PubMed Central journal article supplement (PMC3188483; doi:10.1371/journal.pcbi.1002161), 2011-10-06
Supplement: pcbi.1002161.s007.pdf [file pcbi.1002161.s007.pdf]

Table S1: Parameters of adaptive exponential integrate-and-fire cells

| Cell | $1/g_L$ (M $\Omega$ ) | $\tau_m$ (ms) | $E_L$ (mV) | $V_T$ (mV) | $V_{reset}$ (mV) | $a$ (nS) | $b$ (pA) | $\Delta_T$ (mV) | $\tau_w$ (ms) |
|------|-----------------------|---------------|------------|------------|------------------|----------|----------|-----------------|---------------|
| P    | 182                   | 18            | -65        | -45        | -48              | -0.95    | 250      | 0.8             | 60            |
| FS   | 119                   | 8             | -67        | -47        | -50              | 0        | 80       | 3               | 16            |
