# Supplementary material for: Coexistence of Lateral and Co-Tuned Inhibitory Configurations in Cortical Networks
Source: PubMed Central journal article supplement (PMC3188483; doi:10.1371/journal.pcbi.1002161), 2011-10-06
Supplement: pcbi.1002161.s008.pdf [file pcbi.1002161.s008.pdf]

Table S2: Parameters governing dynamic properties of EPSPs and IPSPs

| Connection | $A$ (nS) | $\alpha$ | U     | $\tau_{\text{rec}}$ (ms) | $\tau_{\text{fac}}$ (ms) |
|------------|----------|----------|-------|--------------------------|--------------------------|
| P→P        | 0.145    | 0.375    | 0.55  | 0.45                     | 0                        |
| P→FS       | 0.47     | 0.55     | 0.55  | 0.60                     | 0                        |
| FS→P       | 0.5      | 0.25     | 0.555 | 0.375                    | 0                        |
| Thal→P     | 0.7      | 0.9      | 0.25  | 0.5                      | 0                        |
| Thal→FS    | 1.8      | 3        | 0.55  | 0.6                      | 0                        |
