# Supplementary material for: Coexistence of Lateral and Co-Tuned Inhibitory Configurations in Cortical Networks
Source: PubMed Central journal article supplement (PMC3188483; doi:10.1371/journal.pcbi.1002161), 2011-10-06
Supplement: pcbi.1002161.s009.pdf [file pcbi.1002161.s009.pdf]

Table S3: Network parameters for the firing rate model:

|             | $\tau$ (ms) | $\rho$ (cells/ $\mu\text{m}$ ) | Synaptic transfer function (S) |               |      |
|-------------|-------------|--------------------------------|--------------------------------|---------------|------|
|             |             |                                | M (Hz)                         | $\theta$ (nA) | n    |
| Excitatory: | 10          | 0.91                           | 136                            | 0.31          | 1.51 |
| Inhibitory: | 7.5         | 0.16                           | 378                            | 0.62          | 1.75 |
